# Supplementary material for: A Paleocene penguin from New Zealand substantiates multiple origins of gigantism in fossil Sphenisciformes
Source: Springer Nature journal article supplement (doi:10.1038/s41467-017-01959-6), 2017-11-28
Supplement: MOESM1 [file 41467_2017_1959_MOESM1_ESM.pdf]

## Supplementary Information

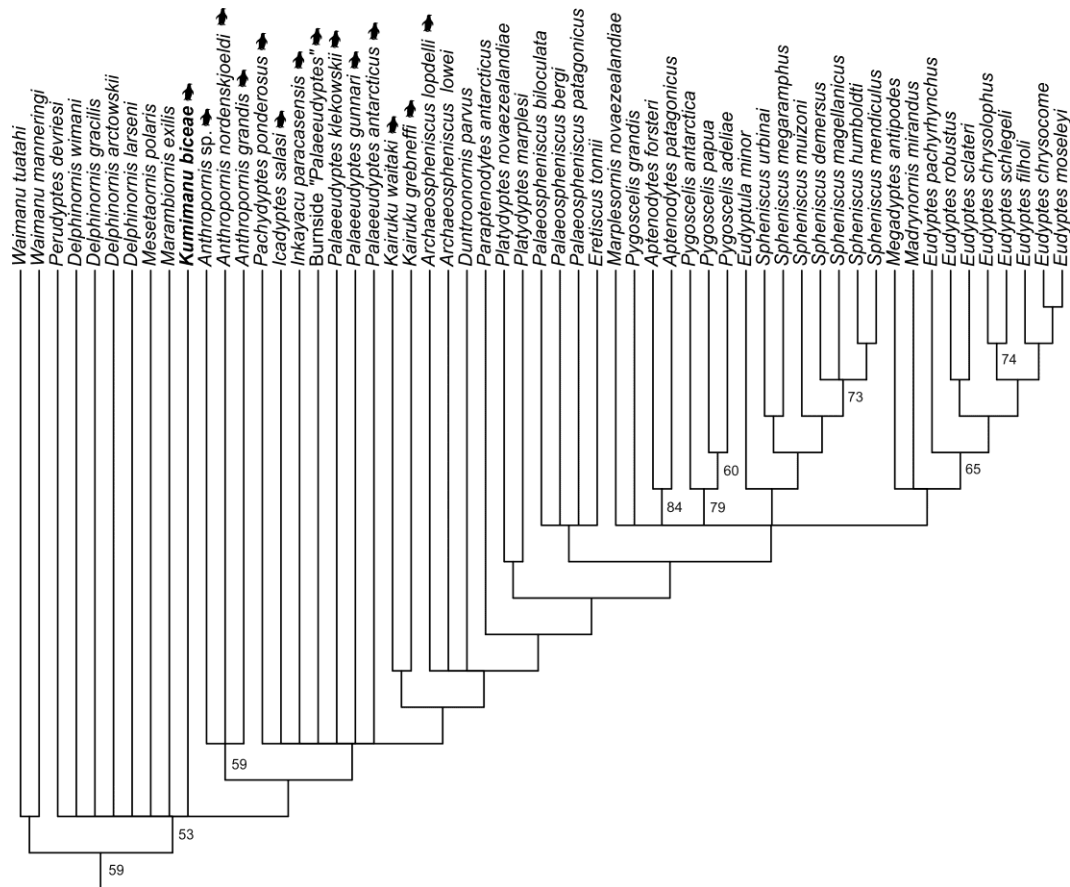

**Supplementary Fig. 1** Strict consensus tree of 10000 most parsimonious tree resulting from the phylogenetic analysis of the primary data set with all taxa included ( $L = 614$ ,  $CI = 0.58$ ,  $RI = 0.90$ ). Bootstrap support values (majority rule consensus) are indicated next to the internodes, unsupported nodes were collapsed. The penguin icons denote giant taxa with a size exceeding that of the Emperor Penguin.
