# Supplementary material for: A Paleocene penguin from New Zealand substantiates multiple origins of gigantism in fossil Sphenisciformes
Source: Springer Nature journal article supplement (doi:10.1038/s41467-017-01959-6), 2017-11-28
Supplement: MOESM3 [file 41467_2017_1959_MOESM3_ESM.pdf]

**File Name:** Supplementary Data 1

**Description:** Nexus file of the full data set (245 characters, 72 taxa).

**File Name:** Supplementary Data 2

**Description:** Nexus file of the data set with a reduced taxonomic sampling and two additional characters added (247 characters, 27 taxa).
